# Supplementary material
Source: PubMed Central journal article supplement (PMC2741389)
Supplement: NIHMS127500-supplement-01.pdf [file NIHMS127500-supplement-01.pdf]

1  
2  
3 **Suppl. Table 1.**  
4  
5  
6

7 **Mouse strains.**  
8  
9

| Phenotype<br>name    | Strain genotype<br>(Stock #) <sup>a</sup>               | Description                                                                                                                                                  | Ref. <sup>b</sup> |
|----------------------|---------------------------------------------------------|--------------------------------------------------------------------------------------------------------------------------------------------------------------|-------------------|
| C57BL/6 (B6)         | B6<br>(#000664)                                         | Parental strain (wild type)                                                                                                                                  | 1                 |
| $\alpha\beta$ TCR KO | B6.129P2- <i>Tcrb</i> <sup>tm1Mom</sup> /J<br>(#002118) | Disruption of T-cell receptor beta ( <i>Tcrb</i> ) chain<br>Deficient in $\alpha\beta$ T cells (CD4 <sup>+</sup> CD8 <sup>+</sup> cells ~6% of<br>wild-type) | 2                 |

10  
11  
12  
13  
14  
15  
16  
17  
18  
19  
20  
21  
22  
23  
24  
25  
26  
27  
28  
29  
30  
31  
32  
33  
34  
35  
36  
37  
38  
39  
40  
41  
42  
43  
44  
45  
46  
47  
48  
49  
50  
51  
52  
53  
54  
55  
56  
57  
58  
59  
60  
61  
62  
63  
64  
65

<sup>a</sup> Immunodeficient (knockout, KO) mice were developed on the C57BL/6 (B6) background. The stock number is indicated in parentheses (Jackson Laboratories, Bar Harbor, Maine).

<sup>b</sup>References: 1. Waterston, R.H., et al. 2002. Initial sequencing and comparative analysis of the mouse genome. *Nature*. 420:520-62; 2. Mombaerts, P., et al. 1992. Mutations in T-cell antigen receptor genes alpha and beta block thymocyte development at different stages. *Nature* 360: 225-31.
